# Supplementary material for: The acceptability judgment of Chinese pseudo-modifiers with and without a sentential context
Source: PLOS journal article supplement (doi:10.1371/journal.pone.0219896), 2019-07-18
Supplement: S6 (10.1371/journal.pone.0219896.s006) [file journal.pone.0219896.s006]

1 **S5 Table.** Results of pairwise T-tests of the semantic acceptability scores for comparisons  
 2 between the CLP types and the controls. In a cell, the first number is by-item *t*-value, and the  
 3 second by-subject *t*-value. Stars indicate *p*-values. Grey cells mark the comparisons having  
 4 both the by-item and by-subject *p*-values bigger than .001.

| <b>CLP \ control</b> | <i>iso_control</i>    |
|----------------------|-----------------------|
| <b>nominal</b>       | 10.738*** / 10.922*** |
| <b>verbal</b>        | 2.265** / 3.689**     |
| <b>temporal</b>      | -.443 / -.591         |

5 Note: \*\*\*  $p < .001$ ; \*\*  $p < .01$ ; \*  $p < .05$ ; #  $p < .1$ .

6
